# Supplementary material for: A Novel Pretreatment-Free Duplex Chamber Digital PCR Detection System for the Absolute Quantitation of GMO Samples
Source: Int J Mol Sci. 2016 Mar 18;17(3):402. doi: 10.3390/ijms17030402 (PMC4813257; doi:10.3390/ijms17030402)
Supplement: Supplementary file 1 [file ijms-17-00402-s001.pdf]

# Supplementary Materials: A Novel Pretreatment-Free Duplex Chamber Digital PCR Detection System for the Absolute Quantitation of GMO Samples

Pengyu Zhu, Chenguang Wang, Kunlun Huang, Yunbo Luo and Wentao Xu

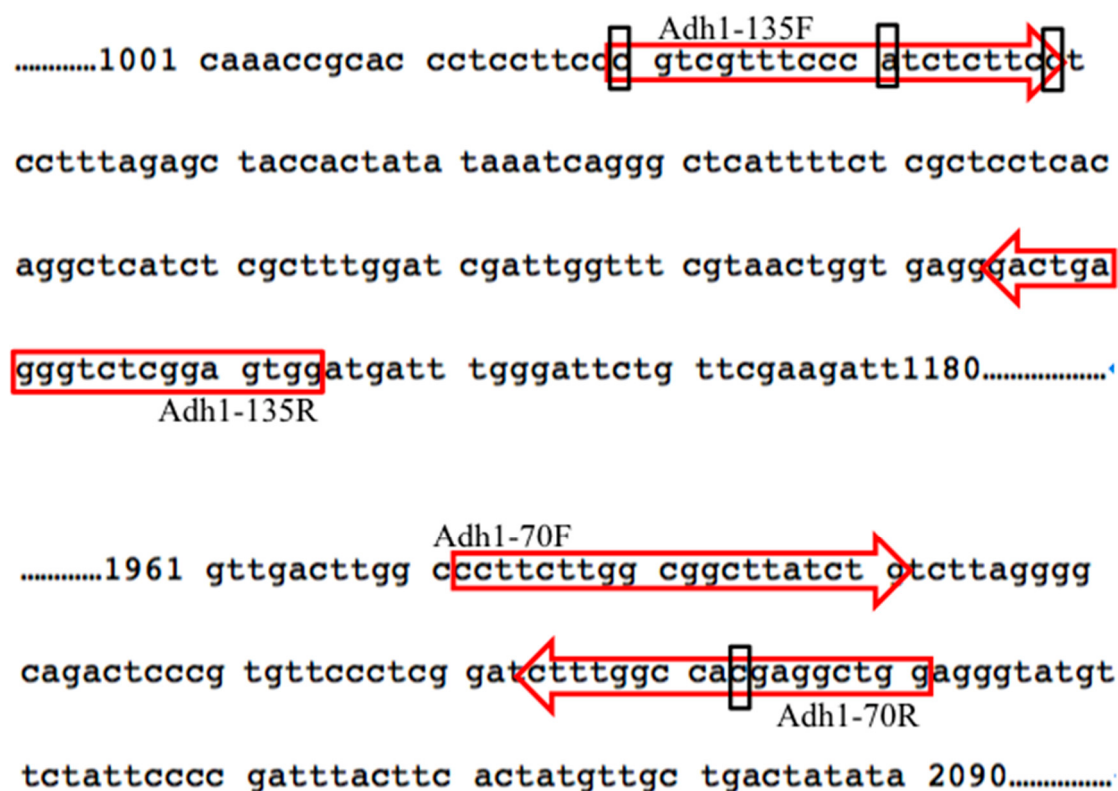

**Figure S1.** The location of the primers in the Adh1 gene. The arrows in red mean the sequences and directions of primers. The columns in black mean the SNP sites evaluated in our study.

**Table S1.** The real-time PCR results for the evaluation of nonspecific annealing bases.

| Probe Name    | Nonspecific Annealing Primer | The Bases of Nonspecific Annealing | The Amplification Efficiency | The $R^2$ of Standard Curve |
|---------------|------------------------------|------------------------------------|------------------------------|-----------------------------|
| Adh1-135P     | None                         | 0                                  | 85.6%                        | 0.990                       |
|               | GA21-P-4                     | 4                                  | 93.1%                        | 0.988                       |
|               | GA21-P-5                     | 5                                  | 89.2%                        | 0.997                       |
| GA21-P        | None                         | 0                                  | 91.5%                        | 0.997                       |
|               | A135-P-4                     | 4                                  | 90.8%                        | 0.996                       |
|               | A135-P-5                     | 5                                  | 92.2%                        | 0.995                       |
| Duplex assays | None                         | None                               | 83.6% (For GA21)             | 0.987 (For GA21)            |
|               | None                         | None                               | 86.7% (For A135)             | 0.992 (For A135)            |

**Table S2.** The real-time PCR results for the evaluation of SNP site of Adh1-70R.

| The Primer Assays    | The Exist of SNP Site   | The Amplification Efficiency | The $R^2$ of Standard Curve | The Equation of Standard Curve |
|----------------------|-------------------------|------------------------------|-----------------------------|--------------------------------|
| Adh1-70F/Adh1-70R    | One SNP in the Adh1-70R | 86.6%                        | 0.967                       | $Ct = -3.722lgC + 30.371$      |
| Adh1-70F/A70-R-M-A-G | No SNP sites            | 102.4%                       | 0.997                       | $Ct = -3.265lgC + 33.173$      |
